# Supplementary material
Source: PubMed Central journal article supplement (PMC10992239)
Supplement: 262_2022_3183_MOESM1_ESM.pdf [file 262_2022_3183_MOESM1_ESM.pdf]

Supplementary Figure 1

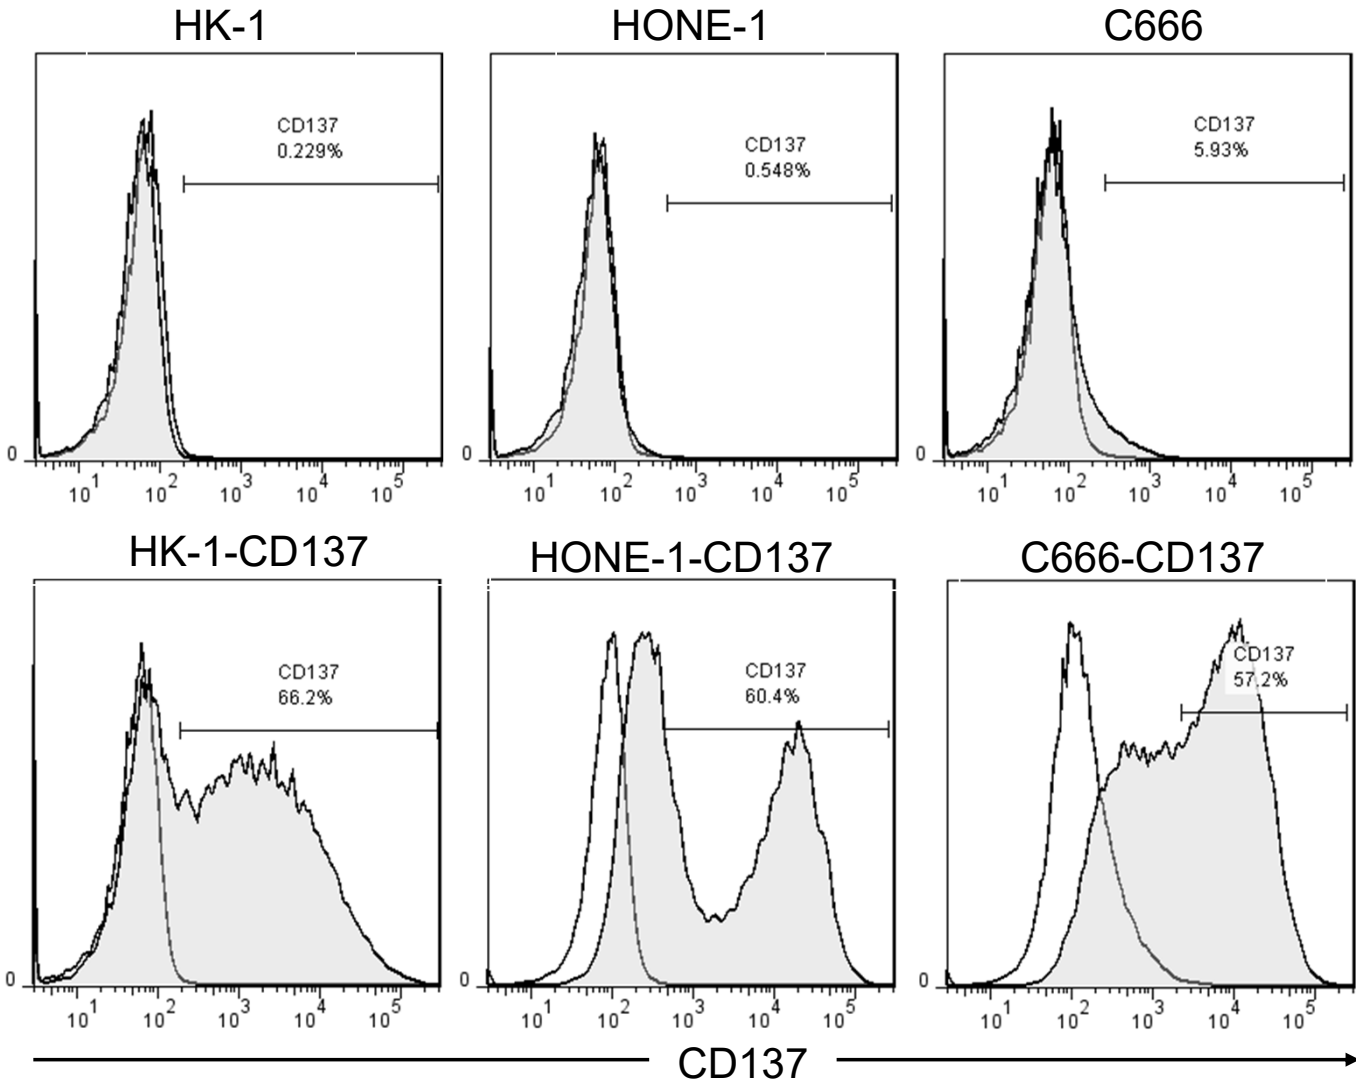

□ isotype  
■  $\alpha$ -CD137

Supplementary Figure 1. Upper row: Parental NPC cell lines. Lower row: NPC cell lines were transfected with an expression vector for full-length CD137, and stable cell lines were established by Blasticidin selection (for HONE-1 and HK-1) and cell sorting for CD137. CD137 expression was quantified by flow cytometry. White histograms: isotype control. Grey histograms: Anti-CD137.

# Supplementary Figure 2

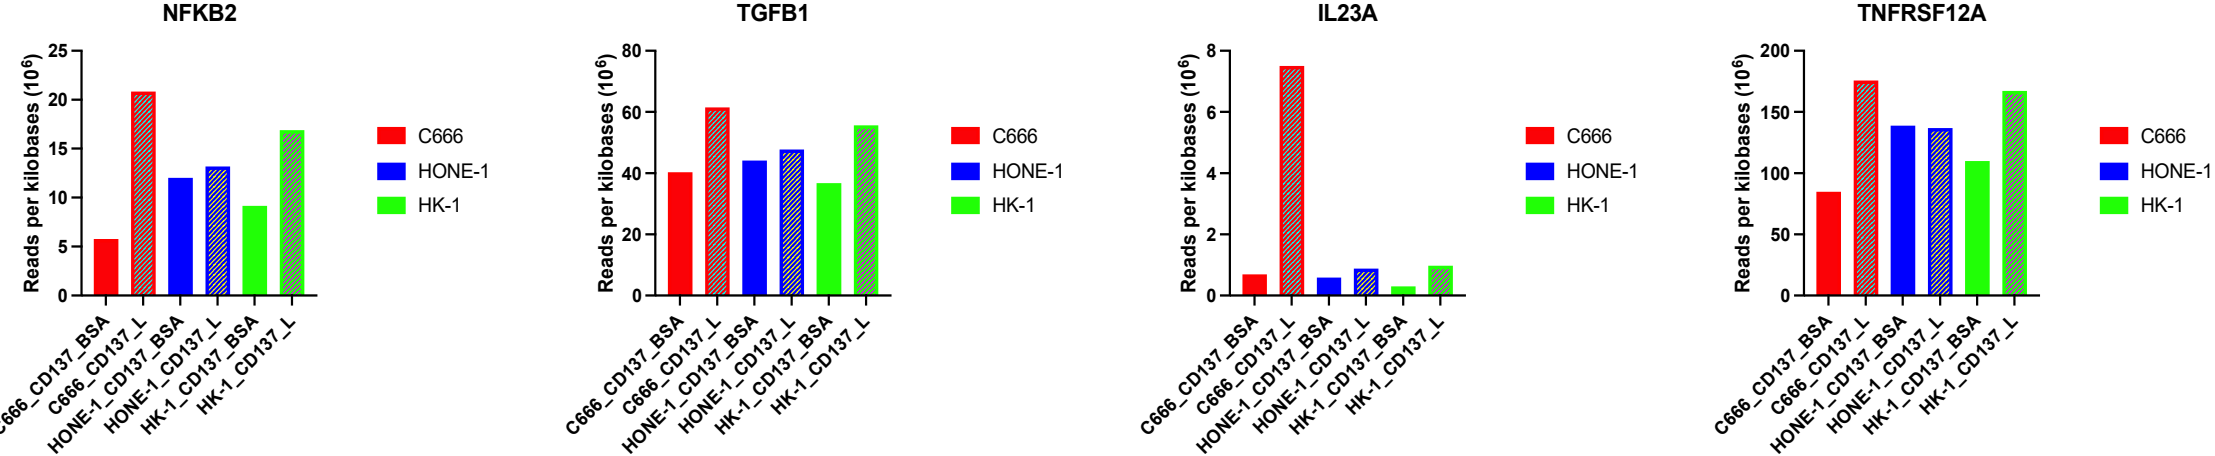

Supplementary Figure 2. CD137-expressing C666, HONE-1 and HK-1 cells were seeded on BSA or rCD137L-coated plates for 24 h. RNA was extracted and sequenced. Depicted are the levels of differentially regulated genes in the 3 NPC cell lines.

### Supplementary Figure 3

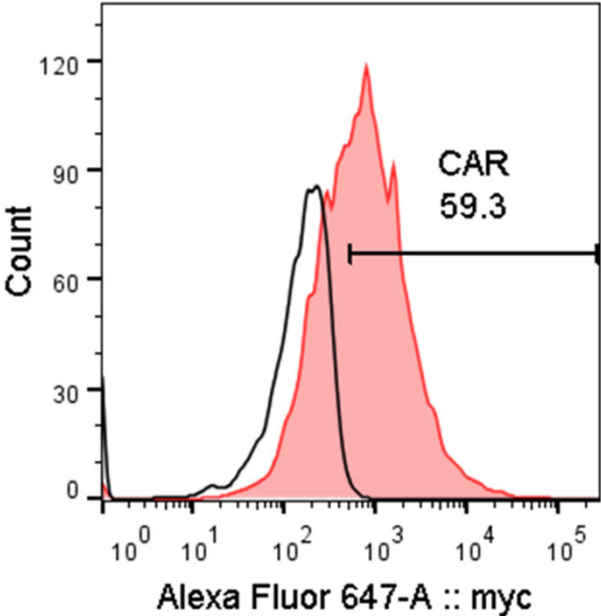

Supplementary Figure 3. Expression of the anti-CD137-CAR. The NK cell line KHYG-1 was transduced to express myc-tagged anti-CD137-CAR which was detected by flow cytometry using an anti-myc tag antibody. White histogram: non-transduced cells. Red histogram: transduced cells. The number in the histogram indicates percentage of positive cells.

**Supplementary Table 1**

| <b>Symbol</b> | <b>log2FoldChange</b> | <b>p value</b> |
|---------------|-----------------------|----------------|
| IL1R2         | 2.69                  | 0.00055        |
| TGFB1         | 0.48                  | 0.00464        |
| NFKB2         | 0.95                  | 0.00541        |
| IL23A         | 2.58                  | 0.00667        |
| LAMC2         | 1.10                  | 0.03829        |

Supplementary Table 1. Listed are log2-fold changes of selected genes from Figure 4A
